# Supplementary material
Source: PubMed Central journal article supplement (PMC3057538)
Supplement: NIHMS246115-supplement-01.pdf [file NIHMS246115-supplement-01.pdf]

Type of file: table

Label: Supp Table S1

Filename: Supplement table-1.xls

## FoxD5 up-regulated genes

| Clone ID          | Access number | Fold Change | Gene name          |
|-------------------|---------------|-------------|--------------------|
| XI.403.1.S1_at    | AF064810      | 4.842       | fkh-5              |
| XI.20011.1.S1_at  | AF461177      | 4.591       | FGF-8b             |
| XI.637.1.A1_at    | AF250345      | 4.501       | Egr                |
| XI.3540.1.S1_at   | AF131890      | 3.943       | fullback           |
| XI.1775.1.S1_at   | U89707        | 3.868       | Brat/VegT          |
| XI.15572.1.A1_at  | BJ088128      | 3.554       | EST                |
| XI.24509.1.A1_at  | BJ078115      | 3.480       | EST                |
| XI.16539.1.A1_at  | BM262065      | 3.436       | EST                |
| XI.26215.1.S1_at  | AB014463      | 3.337       | lens specific gene |
| XI.25938.1.A1_at  | BJ083355      | 3.301       | EST                |
| XI.18191.1.A1_at  | BI312773      | 3.290       | EST                |
| XI.12993.1.A1_at  | BJ051675      | 3.082       | EST                |
| XI.22268.1.S1_at  | BG161338      | 3.050       | EST                |
| XI.15365.1.A1_at  | BJ051730      | 2.930       | EST                |
| XI.1299.1.S1_at   | BC043760      | 2.909       | clone MGC:52917    |
| XI.2547.1.S1_at   | BC044995      | 2.889       | clone MGC:53052    |
| XI.16554.2.A1_at  | BJ047395      | 2.875       | EST                |
| XI.15990.1.A1_at  | BJ043686      | 2.872       | EST                |
| XI.9731.1.A1_at   | CB983184      | 2.842       | EST                |
| XI.1980.1.A1_at   | BG811789      | 2.833       | EST                |
| XI.14214.1.A1_at  | BM191206      | 2.820       | EST                |
| XI.13738.1.A1_at  | BJ075690      | 2.782       | EST                |
| XI.16206.1.A1_at  | BM172525      | 2.756       | EST                |
| XI.16387.1.A1_at  | BJ080337      | 2.676       | EST                |
| XI.10792.1.A1_at  | BE508575      | 2.625       | EST                |
| XI.19601.1.A1_at  | BQ387878      | 2.617       | EST                |
| XI.26420.1.A1_at  | BJ092233      | 2.587       | EST                |
| XI.18364.1.A1_at  | BI315001      | 2.570       | EST                |
| XI.22755.2.A1_at  | BG346398      | 2.544       | EST                |
| XI.14954.1.A1_at  | BJ077727      | 2.505       | EST                |
| XI.24140.2.A1_at  | BJ090312      | 2.494       | EST                |
| XI.15374.1.A1_at  | BJ077463      | 2.474       | EST                |
| XI.25079.1.A1_at  | CB756467      | 2.458       | EST                |
| XI.1613.2.S1_at   | CD255867      | 2.426       | EST                |
| XI.9878.1.A1_at   | BG019848      | 2.416       | EST                |
| XI.10323.1.A1_at  | BF071874      | 2.399       | EST                |
| XI.25895.1.A1_at  | BJ075592      | 2.377       | EST                |
| XI.9031.1.A1_x_at | BG579679      | 2.358       | EST                |
| XI.21150.1.S1_at  | CD099315      | 2.344       | EST                |
| XI.25136.1.A1_at  | CB756627      | 2.341       | EST                |
| XI.22860.1.A1_at  | BJ088831      | 2.326       | EST                |
| XI.23091.1.A1_at  | BG159830      | 2.315       | EST                |
| XI.1871.1.A1_at   | BM261544      | 2.301       | EST                |
| XI.1132.1.S1_at   | AF019906      | 2.298       | LAT-1              |
| XI.2466.1.A1_at   | BG020193      | 2.272       | EST                |
| XI.19075.1.A1_at  | BI675584      | 2.257       | EST                |
| XI.169.1.S1_at    | D44549        | 2.257       | LMP-7              |
| XI.9842.1.A1_at   | BJ082875      | 2.234       | EST                |

|                    |          |       |                                     |
|--------------------|----------|-------|-------------------------------------|
| XI.313.1.S1_a_at   | CB565153 | 2.228 | alpha skeletal tropomyosin          |
| XI.2755.1.S1_a_at  | AY062263 | 2.226 | XSPR-2                              |
| XI.12111.1.S1_at   | AY055473 | 2.212 | prickle b                           |
| XI.782.1.S1_at     | AY029410 | 2.191 | XSAP1                               |
| XI.16174.1.A1_at   | BJ087278 | 2.190 | EST                                 |
| XI.5300.1.A1_at    | BF613163 | 2.187 | EST                                 |
| XI.18730.1.A1_at   | BM260343 | 2.184 | EST                                 |
| XI.25941.1.A1_at   | BM180508 | 2.175 | EST                                 |
| XI.15754.1.A1_at   | BG021580 | 2.174 | EST                                 |
| XI.7415.1.A1_at    | AW764841 | 2.172 | EST                                 |
| XI.14868.1.A1_at   | BJ084549 | 2.162 | EST                                 |
| XI.14652.1.A1_at   | BJ076118 | 2.160 | EST                                 |
| XI.6088.1.A1_at    | AF244359 | 2.158 | RGS                                 |
| XI.693.9.S1_x_at   | AF257332 | 2.153 | calcium-dependent protein kinase II |
| XI.2755.1.S1_at    | AY062263 | 2.153 | XSPR-2                              |
| XI.16545.1.A1_at   | BJ078979 | 2.153 | EST                                 |
| XI.1265.1.S1_at    | BG022051 | 2.152 | 1-Oct                               |
| XI.2220.1.A1_at    | BG159943 | 2.142 | EST                                 |
| XI.2356.1.A1_at    | BJ087466 | 2.135 | EST                                 |
| XI.6592.1.A1_at    | BE491206 | 2.133 | EST                                 |
| XI.7245.1.S1_at    | BJ089797 | 2.124 | EST                                 |
| XI.7794.1.A1_at    | BJ045312 | 2.123 | EST                                 |
| XI.457.1.S1_at     | AF065135 | 2.122 | derriere                            |
| XI.18746.1.S1_at   | BI315519 | 2.118 | EST                                 |
| XI.410.1.S1_at     | AF287147 | 2.109 | XLEF-1                              |
| XI.2803.1.S1_at    | AJ320159 | 2.106 | MAP kinase phosphatase              |
| XI.8774.1.S1_at    | BU899402 | 2.100 | EST                                 |
| XI.15908.1.A1_at   | BJ052205 | 2.099 | EST                                 |
| XI.10603.1.A1_at   | BE491029 | 2.092 | EST                                 |
| XI.7251.1.A1_at    | BJ085697 | 2.091 | EST                                 |
| XI.1182.1.S1_at    | X65943   | 2.086 | FGFR-2                              |
| XI.3636.1.A1_at    | BI443057 | 2.084 | EST                                 |
| XI.26331.1.A1_at   | CD361868 | 2.083 | EST                                 |
| XI.11060.1.A1_at   | AW764623 | 2.081 | EST                                 |
| XI.24128.1.S1_at   | CD256981 | 2.075 | EST                                 |
| XI.24121.1.A1_at   | BJ049047 | 2.071 | EST                                 |
| XI.127.1.S1_at     | BJ044569 | 2.055 | vimentin                            |
| XI.14624.1.A1_at   | BJ056784 | 2.051 | EST                                 |
| XI.14436.1.A1_x_at | BJ056465 | 2.047 | EST                                 |
| XI.15758.1.A1_at   | BJ076791 | 2.030 | EST                                 |
| XI.3529.1.A1_at    | BJ056268 | 2.022 | EST                                 |
| XI.24009.1.S1_at   | BJ055497 | 2.019 | EST                                 |
| XI.5454.1.S1_at    | AF394111 | 2.016 | Xmc                                 |
| XI.5085.1.A1_at    | BE508415 | 2.012 | EST                                 |
| XI.17388.1.S1_at   | AF467986 | 2.010 | ADP-ribosylation factor             |
| XI.7815.1.A1_at    | BJ056085 | 2.006 | EST                                 |
| XI.25257.1.A1_at   | BJ076742 | 2.006 | EST                                 |
